# Supplementary material for: Bimetallic NiIr nanoparticles supported on lanthanum oxy-carbonate as highly efficient catalysts for hydrogen evolution from hydrazine borane and hydrazine
Source: Royal Society of Chemistry journal article supplement (doi:10.1039/c9qi00848a), 2019-01-01
Supplement: c9qi00848a1.pdf [file c9qi00848a1.pdf]

**Bimetallic NiIr nanoparticles supported on lanthanum oxy-carbonate  
as highly efficient catalysts for hydrogen evolution from hydrazine  
borane and hydrazine**

Xiaoling Hong, Qilu Yao\*, Meiling Huang, Hongxia Du, Zhang-Hui Lu\*

*Institute of Advanced Materials (IAM), College of Chemistry and Chemical  
Engineering, Jiangxi Normal University, Nanchang 330022, P.R. China.*

E-mail: yaoqilu@jxnu.edu.cn; luzh@jxnu.edu.cn

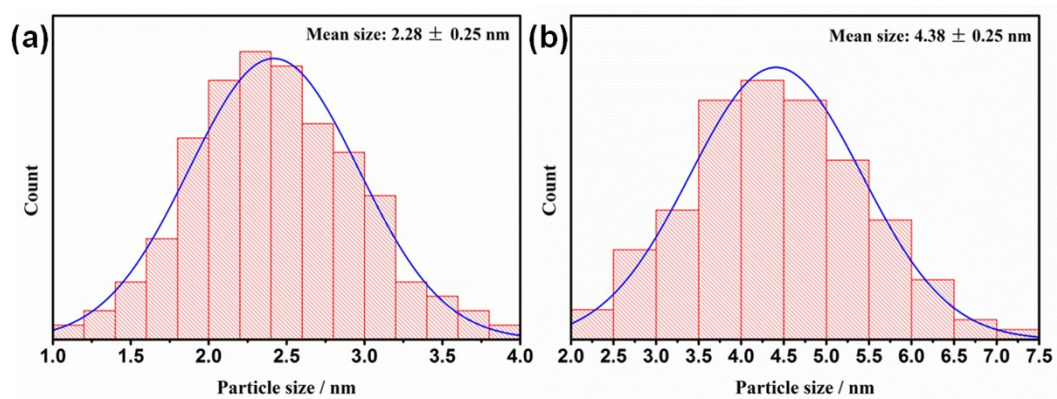

**Fig. S1** The particle size distributions of (a)  $\text{Ni}_{0.75}\text{Ir}_{0.25}/\text{La}_2\text{O}_2\text{CO}_3$  and (b)  $\text{Ni}_{0.75}\text{Ir}_{0.25}/\text{La}_2\text{O}_2\text{CO}_3\text{-N NCs}$ .

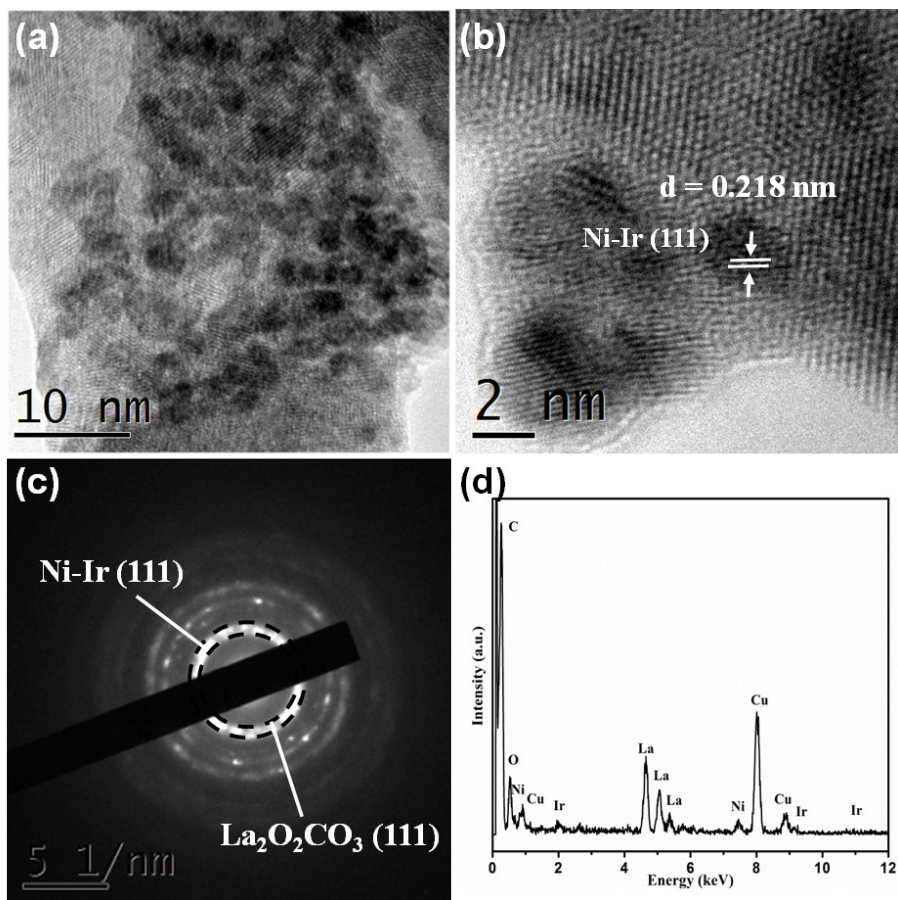

**Fig. S2** (a) Typical TEM image, (b) high-resolution TEM image, (c) SAED pattern, (d) EDX pattern of  $\text{Ni}_{0.75}\text{Ir}_{0.25}/\text{La}_2\text{O}_2\text{CO}_3$  NCs.

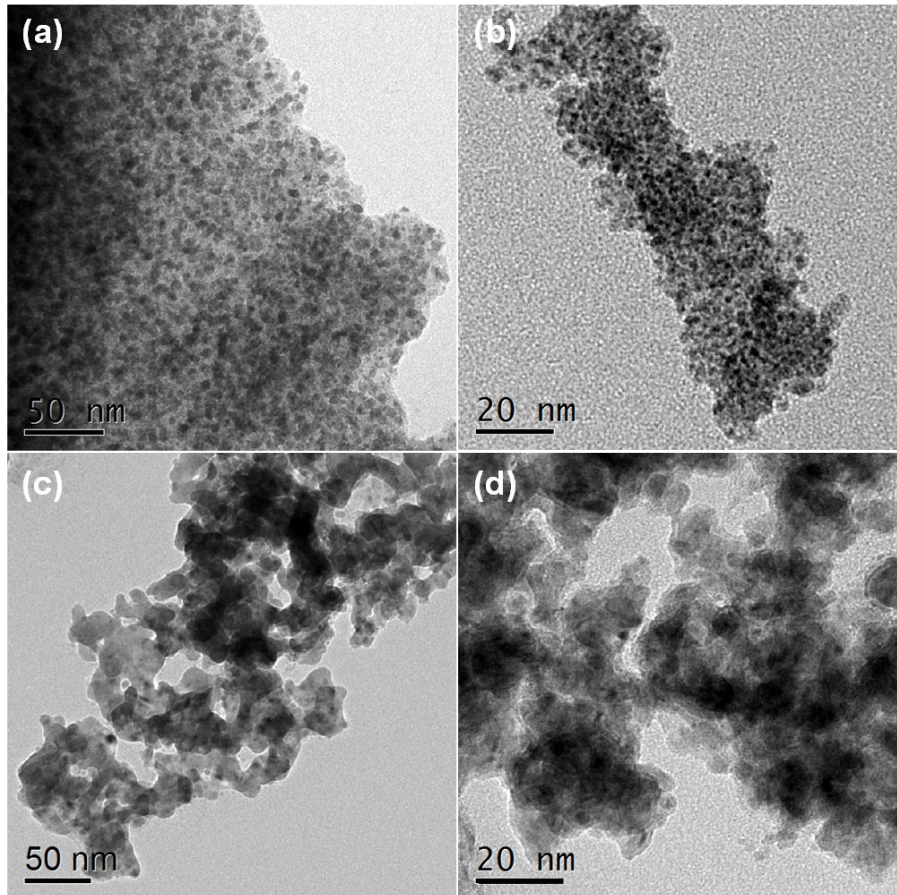

**Fig. S3** Typical TEM images of (a,b)  $\text{Ni}_{0.75}\text{Ir}_{0.25}$  and (c,d)  $\text{Ni}_{0.75}\text{Ir}_{0.25}\text{-N}$  samples.

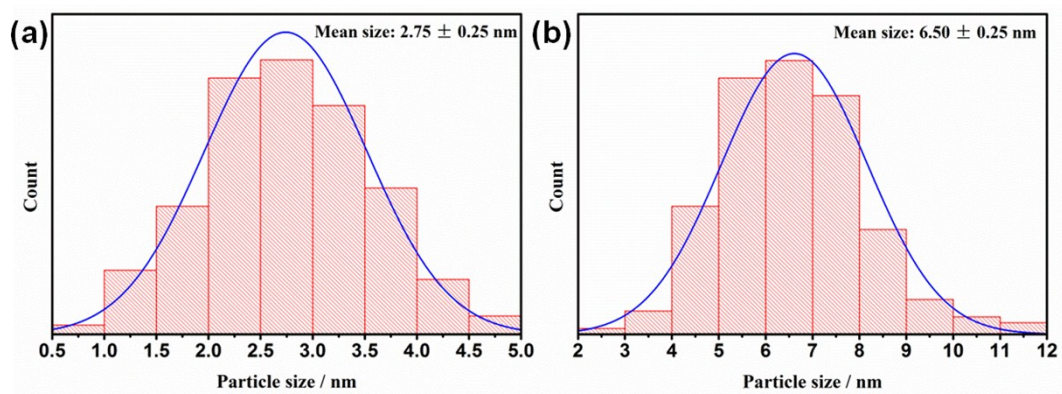

**Fig. S4** The particle size distributions of the catalysts (a)  $\text{Ni}_{0.75}\text{Ir}_{0.25}$  and (b)  $\text{Ni}_{0.75}\text{Ir}_{0.25}$ -N samples.

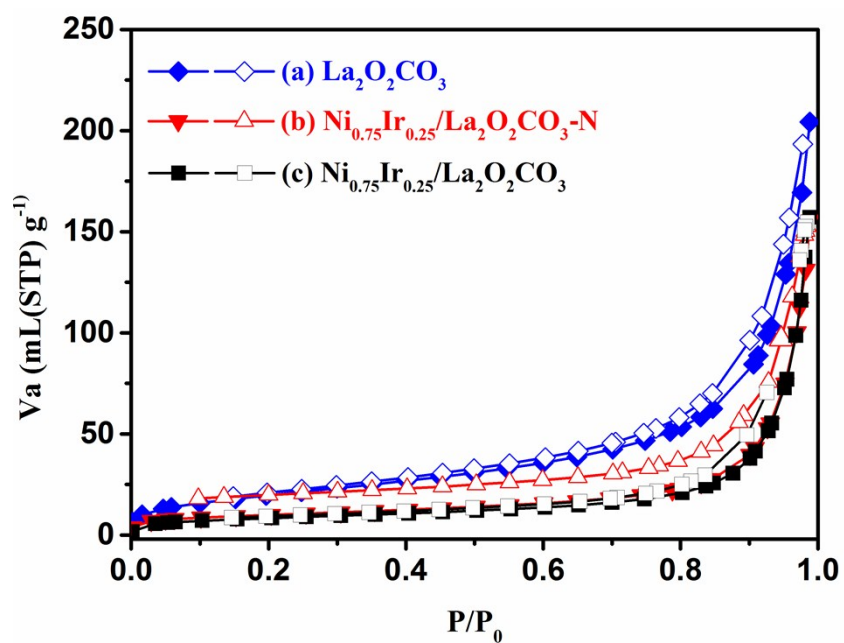

**Fig. S5**  $N_2$  adsorption-desorption isotherms of (a)  $La_2O_2CO_3$ , (b)  $Ni_{0.75}Ir_{0.25}/La_2O_2CO_3-N$  and (c)  $Ni_{0.75}Ir_{0.25}/La_2O_2CO_3$  catalysts.



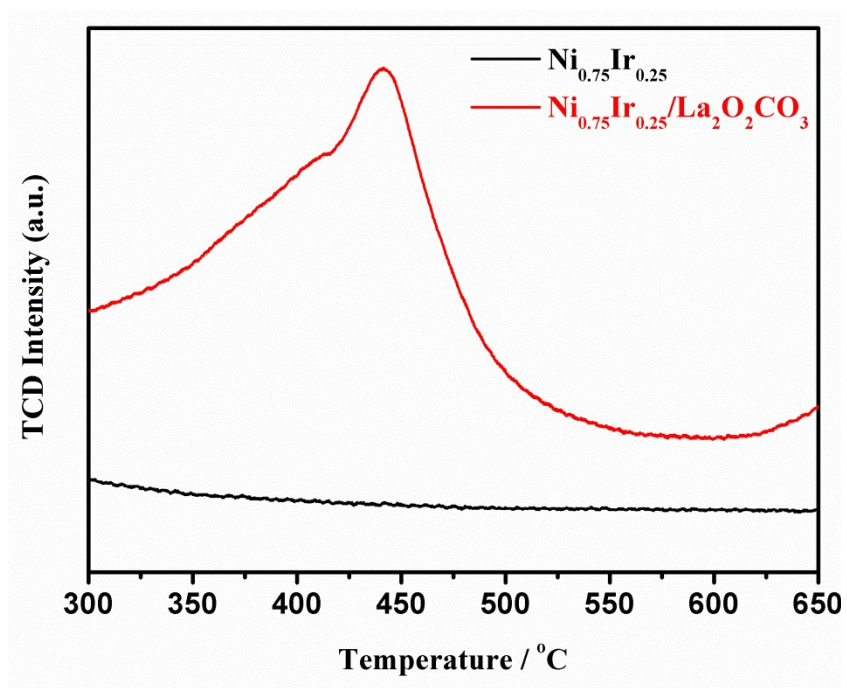

**Fig. S6** CO<sub>2</sub>-TPD mass spectra of the pure Ni<sub>0.75</sub>Ir<sub>0.25</sub> NPs and Ni<sub>0.75</sub>Ir<sub>0.25</sub>/La<sub>2</sub>O<sub>2</sub>CO<sub>3</sub> catalysts.

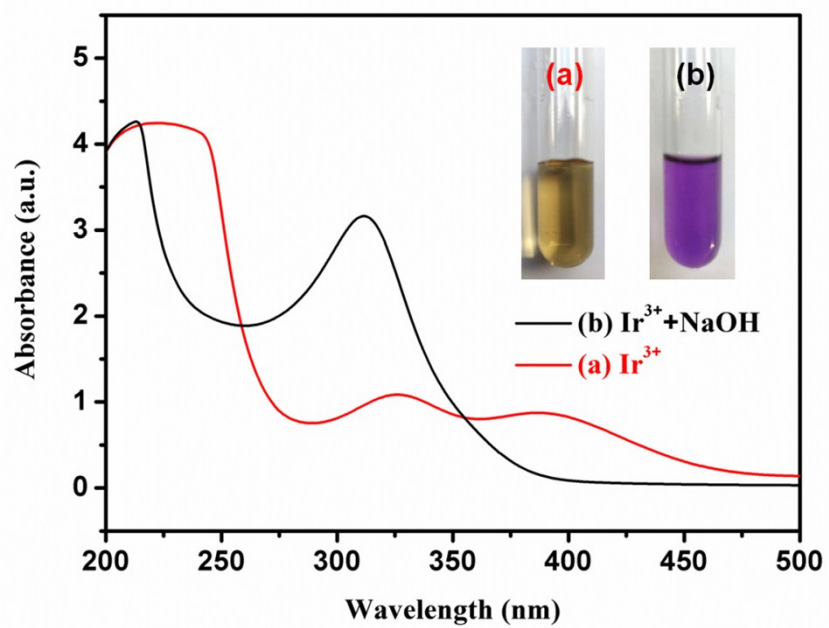

**Fig. S7** UV-Vis spectra and the corresponding photos of (a) IrCl<sub>3</sub>·xH<sub>2</sub>O aqueous solution and (b) IrCl<sub>3</sub>·xH<sub>2</sub>O with NaOH mixture aqueous solution.



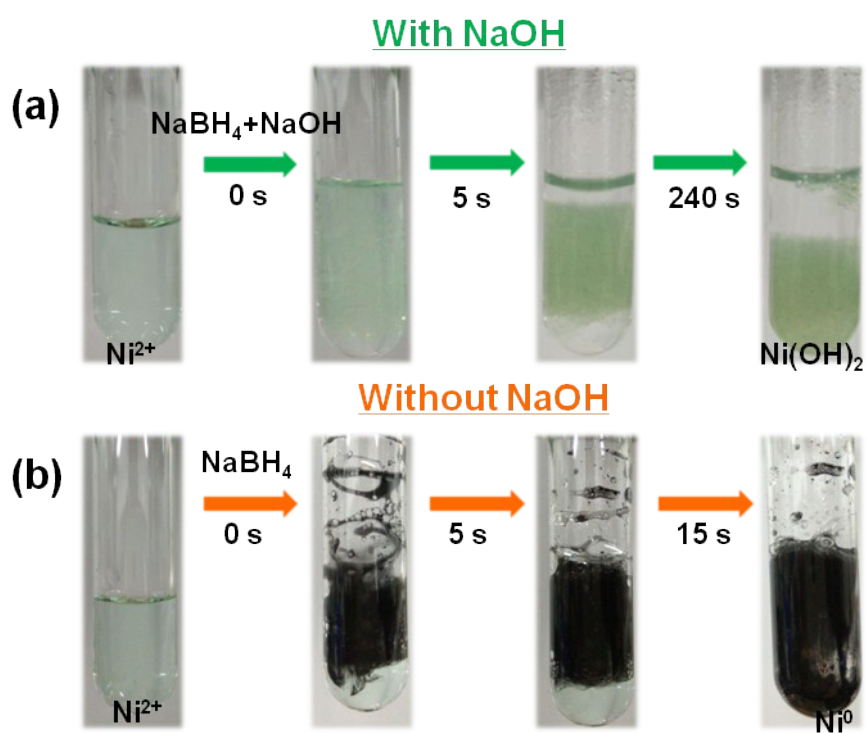

**Fig. S8** The color changes of the aqueous solution of  $\text{NiCl}_2$  during the reduction processes in the (a) presence and (b) absence of NaOH added.

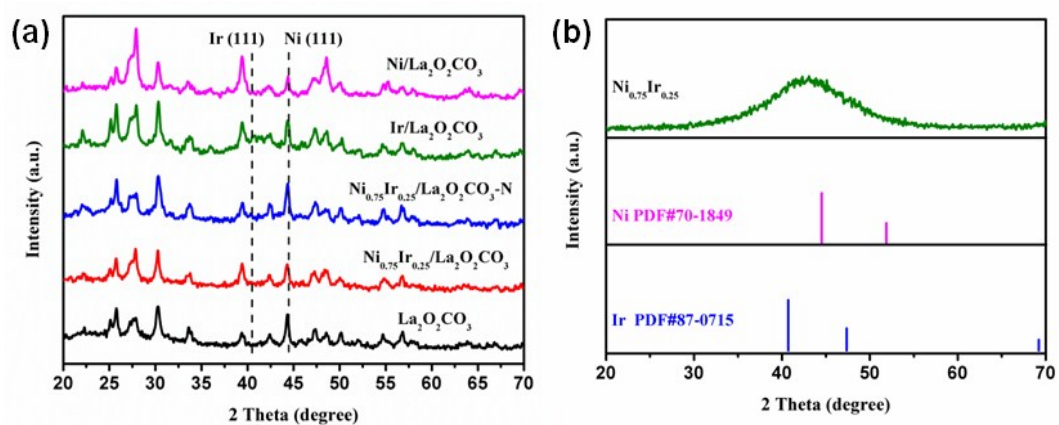

**Fig. S9** Powder XRD diffraction patterns of the as-synthesized (a) La<sub>2</sub>O<sub>2</sub>CO<sub>3</sub>, Ni/La<sub>2</sub>O<sub>2</sub>CO<sub>3</sub>, Ir/La<sub>2</sub>O<sub>2</sub>CO<sub>3</sub>, Ni<sub>0.75</sub>Ir<sub>0.25</sub>/La<sub>2</sub>O<sub>2</sub>CO<sub>3</sub>-N, Ni<sub>0.75</sub>Ir<sub>0.25</sub>, and Ni<sub>0.75</sub>Ir<sub>0.25</sub>/La<sub>2</sub>O<sub>2</sub>CO<sub>3</sub> samples. (b) Powder XRD diffraction patterns of Ni<sub>0.75</sub>Ir<sub>0.25</sub> NPs.

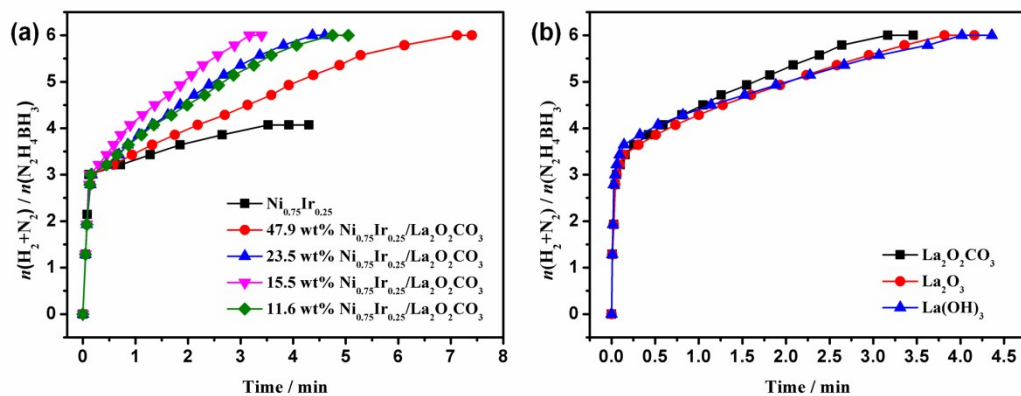

**Fig. S10** Time course plots for H<sub>2</sub> generation from aqueous solution of N<sub>2</sub>H<sub>4</sub>BH<sub>3</sub> (200 mM, 5 mL) (a) over Ni<sub>0.75</sub>Ir<sub>0.25</sub>/La<sub>2</sub>O<sub>2</sub>CO<sub>3</sub> with different amount of La<sub>2</sub>O<sub>2</sub>CO<sub>3</sub> at 323 K ( $n_{(\text{Ni}+\text{Ir})}/n_{(\text{N}_2\text{H}_4\text{BH}_3)} = 0.1$ ) and (b) over Ni<sub>0.75</sub>Ir<sub>0.25</sub>/La<sub>2</sub>O<sub>2</sub>CO<sub>3</sub>, Ni<sub>0.75</sub>Ir<sub>0.25</sub>/La<sub>2</sub>O<sub>3</sub> and Ni<sub>0.75</sub>Ir<sub>0.25</sub>/La(OH)<sub>3</sub>.

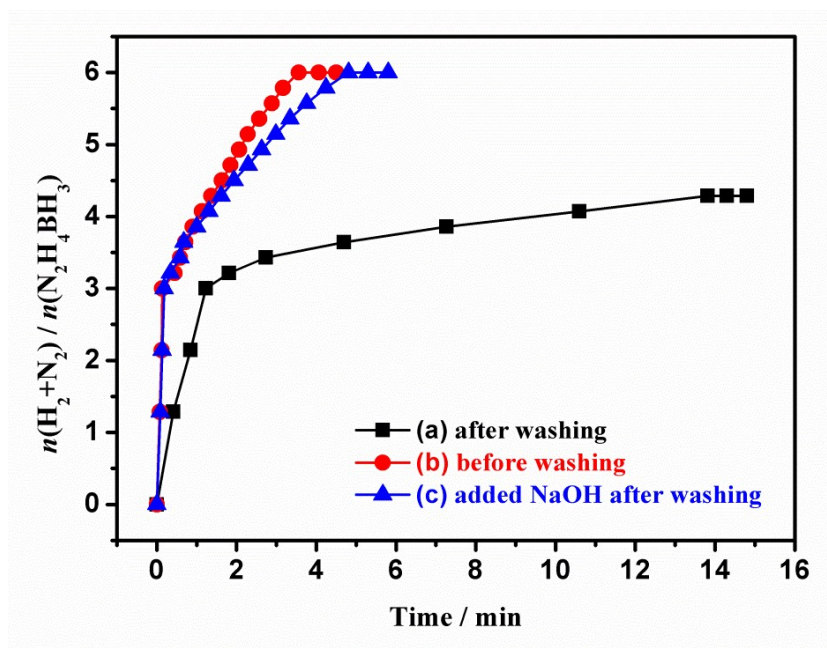

**Fig. S11** Time course plots for H<sub>2</sub> generation from aqueous solution of N<sub>2</sub>H<sub>4</sub>BH<sub>3</sub> (200 mM, 5 mL) over Ni<sub>0.75</sub>Ir<sub>0.25</sub>/La<sub>2</sub>O<sub>2</sub>CO<sub>3</sub> (a) after washing, (b) before washing and (c) added NaOH after washing ( $n_{(\text{Ni}+\text{Ir})}/n_{(\text{N}_2\text{H}_4\text{BH}_3)} = 0.1$ ).

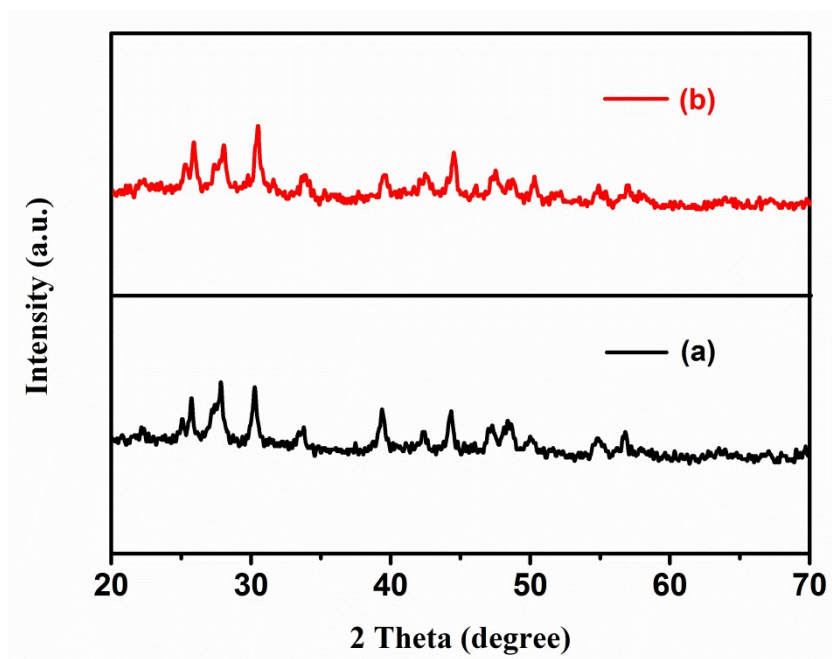

**Fig. S12** Powder XRD diffraction patterns of in the  $\text{Ni}_{0.75}\text{Ir}_{0.25}/\text{La}_2\text{O}_2\text{CO}_3$  (a) before and (b) after the durability test.

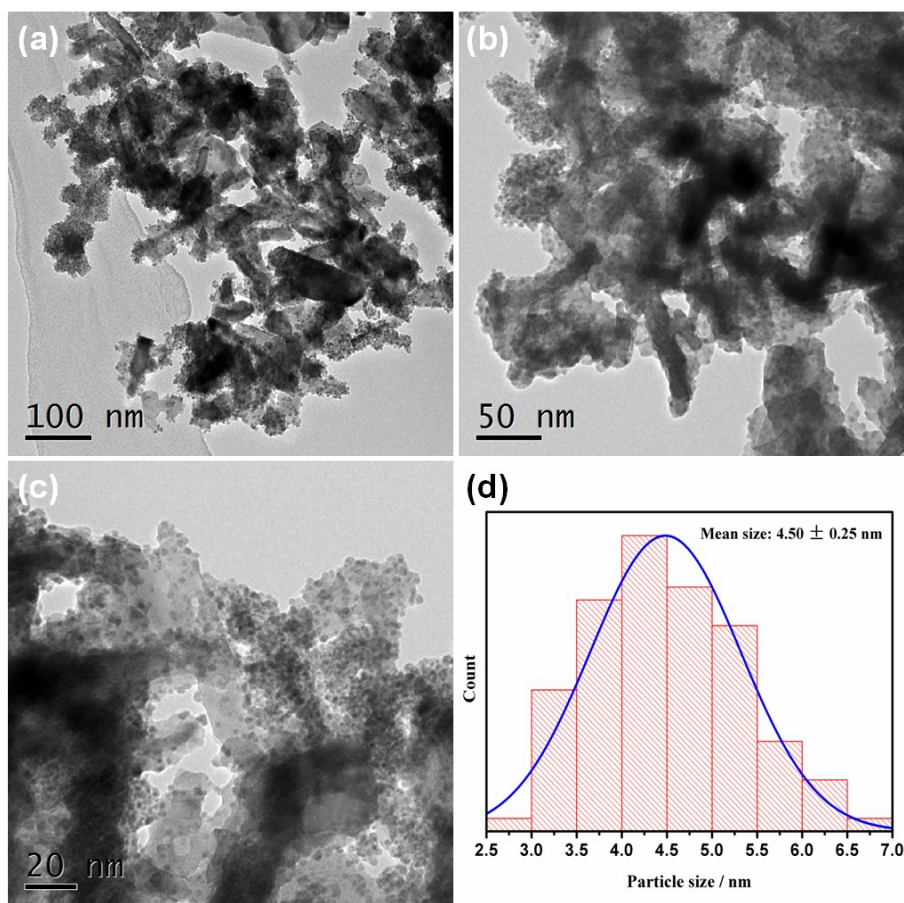

**Fig. S13** (a-c) Typical TEM images and (d) the particle size distribution of the  $\text{Ni}_{0.75}\text{Ir}_{0.25}/\text{La}_2\text{O}_2\text{CO}_3$  after the durability test.

**Table S1** Comparison of the catalytic performance of different catalysts for H<sub>2</sub> generation from N<sub>2</sub>H<sub>4</sub>BH<sub>3</sub>.

| Catalyst                                                                            | T/K        | NaOH/M     | $n(\text{H}_2+\text{N}_2)/n(\text{HB})$ | TOF/h <sup>-1</sup> | Ref.             |
|-------------------------------------------------------------------------------------|------------|------------|-----------------------------------------|---------------------|------------------|
| Rh <sub>0.5</sub> (Mo <sub>x</sub> ) <sub>0.5</sub>                                 | 323        | 2.0        | 6.0                                     | 2000 <sup>b</sup>   | S1               |
| Ni <sub>0.9</sub> Pt <sub>0.1</sub> /MIL-101                                        | 323        | 0.5        | 6.0                                     | 1515 <sup>b</sup>   | S2               |
| <b>Ni<sub>0.75</sub>Ir<sub>0.25</sub>/La<sub>2</sub>O<sub>2</sub>CO<sub>3</sub></b> | <b>323</b> | <b>1.2</b> | <b>6.0</b>                              | <b>1250.0</b>       | <b>This work</b> |
| Raney Ni                                                                            | 298        | 1.0        | 6.0                                     | 892 <sup>b</sup>    | S3               |
| Rh <sub>0.8</sub> Ni <sub>0.2</sub> @CeO <sub>x</sub> /rGO                          | 323        | 0.5        | 6.0                                     | 666.7 <sup>b</sup>  | S4               |
| Ni-MoO <sub>x</sub> /BN                                                             | 323        | 1.0        | 6.0                                     | 600.0 <sup>b</sup>  | S5               |
| Ni <sub>0.5</sub> Fe <sub>0.5</sub> -CeO <sub>x</sub> /MIL-101                      | 343        | 0.5        | 6.0                                     | 351.3 <sup>b</sup>  | S6               |
| NiIr/Cr <sub>2</sub> O <sub>3</sub>                                                 | 323        | 0.5        | 6.0                                     | 247.9 <sup>a</sup>  | S7               |
| Ni <sub>0.6</sub> Pt <sub>0.4</sub> /MSC-30                                         | 303        | 0.6        | 6.0                                     | 240 <sup>a</sup>    | S8               |
| Ni <sub>0.9</sub> Pt <sub>0.1</sub> /graphene                                       | 323        | 0.5        | 6.0                                     | 240 <sup>b</sup>    | S9               |
| Ni <sub>0.9</sub> Pt <sub>0.1</sub> -CeO <sub>2</sub>                               | 323        | 0.5        | 5.74                                    | 234 <sup>b</sup>    | S10              |
| Cu <sub>0.4</sub> Ni <sub>0.6</sub> Mo                                              | 323        | 2.0        | 6.0                                     | 108 <sup>b</sup>    | S11              |
| Ni@(RhNi-alloy)/Al <sub>2</sub> O <sub>3</sub>                                      | 323        | without    | 5.74                                    | 72.0 <sup>a</sup>   | S12              |
| Ni <sub>5</sub> @Pt                                                                 | 323        | without    | 4.4                                     | 2.3 <sup>a</sup>    | S13              |

<sup>a</sup>The total TOF values were calculated according to the original data provided by the reports.

<sup>b</sup>The initial TOF values and NaOH concentration were provided by the reports.



**Table S2** Comparison of the catalytic performance of different catalysts for H<sub>2</sub> generation by N<sub>2</sub>H<sub>4</sub>·H<sub>2</sub>O decomposition.

| Catalyst                                                                            | T/K        | NaOH/M     | $\frac{n(\text{H}_2+\text{N}_2)}{n(\text{N}_2\text{H}_4)}$ | TOF/h <sup>-1</sup> | Ref.             |
|-------------------------------------------------------------------------------------|------------|------------|------------------------------------------------------------|---------------------|------------------|
| CoPt/La(OH) <sub>3</sub>                                                            | 323        | 3.5        | 3.0                                                        | 2400 <sup>b</sup>   | S14              |
| Ni <sub>0.6</sub> Pt <sub>0.4</sub> /g-C <sub>3</sub> N <sub>4</sub>                | 323        | 0.75       | 3.0                                                        | 2194 <sup>b</sup>   | S15              |
| Rh <sub>0.5</sub> (MoO <sub>x</sub> ) <sub>0.5</sub>                                | 323        | 2.0        | 3.0                                                        | 725 <sup>b</sup>    | S1               |
| Ni <sub>0.9</sub> Pt <sub>0.1</sub> /MIL-101                                        | 323        | 0.5        | 3.0                                                        | 621 <sup>b</sup>    | S2               |
| <b>Ni<sub>0.75</sub>Ir<sub>0.25</sub>/La<sub>2</sub>O<sub>2</sub>CO<sub>3</sub></b> | <b>323</b> | <b>1.2</b> | 3.0                                                        | <b>487.3</b>        | <b>This work</b> |
| Ni <sub>0.85</sub> Ir <sub>0.15</sub> @MIL-101                                      | 323        | 0.5        | 3.0                                                        | 464 <sup>b</sup>    | S16              |
| Rh <sub>55</sub> Ni <sub>45</sub> /Ce(OH)CO <sub>3</sub>                            | 323        | 0.5        | 3.0                                                        | 395 <sup>b</sup>    | S17              |
| Rh <sub>0.8</sub> Ni <sub>0.2</sub> @CeO <sub>x</sub> /rGO                          | 323        | 0.5        | 3.0                                                        | 210.5 <sup>b</sup>  | S4               |
| Ni <sub>87</sub> Pt <sub>13</sub> /MA                                               | 323        | 0.5        | 2.97                                                       | 160 <sup>b</sup>    | S18              |
| Rh <sub>55</sub> Ni <sub>45</sub> /Ce(OH)CO <sub>3</sub>                            | 303        | 0.5        | 3.0                                                        | 150 <sup>b</sup>    | S17              |
| Ni <sub>0.9</sub> (PtRh) <sub>0.05</sub> /La <sub>2</sub> O <sub>3</sub>            | 298        | 0.5        | 3.0                                                        | 66.7 <sup>a</sup>   | S19              |
| Rh-Ni-B                                                                             | 303        | 1.0        | 3.0                                                        | 54.5 <sup>a</sup>   | S20              |
| Ni-0.080CeO <sub>2</sub>                                                            | 303        | without    | 2.97                                                       | 51.6 <sup>b</sup>   | S21              |
| RhNi/graphene                                                                       | 323        | 1.0        | 3.0                                                        | 37.5 <sup>a</sup>   | S22              |
| Ni/CeO <sub>2</sub>                                                                 | 323        | 0.5        | 3.0                                                        | 34.0 <sup>b</sup>   | S23              |
| Ni <sub>0.9</sub> Pt <sub>0.1</sub> /Ce <sub>2</sub> O <sub>3</sub>                 | 298        | 0.5        | 3.0                                                        | 28.1 <sup>b</sup>   | S24              |
| NiMoB/La(OH) <sub>3</sub>                                                           | 323        | 2.0        | 3.0                                                        | 13.3 <sup>b</sup>   | S25              |
| NiIr <sub>0.059</sub> /Al <sub>2</sub> O <sub>3</sub>                               | 303        | without    | 2.8                                                        | 12.4 <sup>b</sup>   | S26              |
| Rh <sub>4</sub> Ni NPs                                                              | 298        | without    | 3.0                                                        | 6.0 <sup>a</sup>    | S27              |
| Ni-Al <sub>2</sub> O <sub>3</sub> -HT                                               | 303        | without    | 3.0                                                        | 4.8 <sup>a</sup>    | S28              |
| Ni <sub>0.95</sub> Ir <sub>0.05</sub> -CTAB                                         | 298        | without    | 3.0                                                        | 3.1 <sup>a</sup>    | S29              |

<sup>a</sup>The total TOF values were calculated according to the original data provided by the reports.

<sup>b</sup>The initial TOF values were provided by the reports.

### Calculation method for TOF

The total turn-over frequency (TOF) reported in this work was an apparent TOF value based on the number of metal (Ir+Ni) atoms in catalysts, which was calculated from the equation as follows:

$$\text{TOF} = \frac{n_{\text{H}_2}}{n_{\text{metal}} \cdot t}$$

Where  $n_{\text{H}_2}$  was the mole number of generated  $\text{H}_2$ ,  $n_{\text{metal}}$  was the total mole number of Ni and Ir in catalyst and  $t$  was the completed reaction time in hour.

## References

- S1 Q. L. Yao, M. He, X. L. Hong, X. Y. Chen, G. Feng and Z. H. Lu, *Int. J. Hydrogen Energy*, doi.org/10.1016/j.ijhydene.2019.02.105.
- S2 Z. J. Zhang, S. L. Zhang, Q. L. Yao, X. S. Chen and Z. H. Lu, *Inorg. Chem.*, 2017, **56**, 11938-11945.
- S3 S. L. Zhang, Q. L. Yao, Q. Y. Li, G. Feng and Z. H. Lu, *Energy Technol.*, 2019, **3**, 1800533.
- S4 Z. J. Zhang, Z. H. Lu, H. L. Tan, X. S. Chen and Q. L. Yao, *J. Mater. Chem. A*, 2015, **3**, 23520-23529.
- S5 S. J. Li, X. Kang, B. R. Wulan, X. L. Qu, K. Zheng, X. D. Han and J. M. Yan, *Small Methods*, 2018, 1800250.
- S6 S. J. Li, H. L. Wang, B. R. Wulan, X. B. Zhang, J. M. Yan and Q. Jiang, *Adv. Energy Mater.*, 2018, 1800625.
- S7 J. M. Chen, Z. H. Lu, Q. L. Yao, G. Feng, Y. Luo, *J. Mater. Chem. A*, 2018, **6**, 20746-20752.
- S8 Q. L. Zhu, D. C. Zhong, U. B. Demirci and Q. Xu, *ACS Catal.*, 2014, **4**, 4261-4268.
- S9 Z. J. Zhang, Z. H. Lu and X. S. Chen, *ACS Sustainable Chem. Eng.*, 2015, **3**, 1255-1261.
- S10 Z. J. Zhang, Y. Q. Wang, X. S. Chen and Z. H. Lu, *J. Power Sources*, 2015, **291**, 14-19.
- S11 Q. L. Yao, Z. H. Lu, R. Zhang, S. L. Zhang, X. S. Chen and H. L. Jiang, *J. Mater. Chem. A*, 2018, **6**, 4386-4393.
- S12 C. Li, Y. Dou, J. Liu, Y. Chen, S. He, M. Wei, D. G. Evans and X. Duan, *Chem. Commun.*, 2015, **49**, 9992-9994.
- S13 D. Clemençon, J. F. Petit, U. B. Demirci, Q. Xu and P. Miele, *J. Power Sources*, 2014, **260**, 77-81.
- S14 K. Wang, Q. L. Yao, S. J. Qing and Z. H. Lu, *J. Mater. Chem. A*, 2019, **7**, 9903-9911.
- S15 C. Wan, L. Sun, L. X. Xu, D. G. Cheng, F. Q. Chen, X. L. Zhan and Y. R. Yang, *J. Mater. Chem. A*, 2019, **7**, 8798-8804.
- S16 P. P. Zhao, N. Cao, J. Su, W. Luo and G. Z. Cheng, *ACS Sustainable Chem. Eng.*, 2015, **3**, 1086-1093.

- S17 J. M. Chen, Q. L. Yao, J. Zhu, X. S. Chen and Z. H. Lu, *Int. J. Hydrogen Energy*, 2016, **41**, 3946-3954.
- S18 Y. Y. Jiang, Q. Kang, J. J. Zhang, H. B. Dai and P. Wang, *J. Power Sources*, 2015, **273**, 554-560.
- S19 Song-II O, J. M. Yan, H. L. Wang, Z. L. Wang and Q. Jiang, *J. Power Sources*, 2014, **262**, 386-390.
- S20 J. Wang, W. Li, Y. Wen, L. Gu, Y. Zhang, *Adv. Energy Mater.*, 2015, 1401879.
- S21 L. He, B. L. Liang, L. Li, X. F. Yang, Y. Q. Huang, A. Q. Wang, X. D. Wang and T. Zhang, *ACS Catal.*, 2015, **5**, 1623-1628.
- S22 J. Wang, X. B. Zhang, Z. L. Wang, L. M. Wang and Y. Zhang, *Energy Environ. Sci.*, 2012, **5**, 6885-6888.
- S23 W. Kang and A. Varma, *Appl. Catal. B Environ.*, 2018, **220**, 409-416.
- S24 H. L. Wang, J. M. Yan, Z. L. Wang, S. I. O and Q. Jiang, *J. Mater. Chem. A*, 2013, **1**, 14957-14962.
- S25 J. Zhang, Q. Kang, Z. Yang, H. Dai, D. Zhuang and P. Wang, *J. Mater. Chem. A*, 2013, **1**, 11623-11628.
- S26 L. He, Y. Q. Huang, X. Y. Liu, L. Li, A. Q. Wang, X. D. Wang, C. Y. Mou and T. Zhang, *Appl. Catal. B Environ.*, 2014, **147**, 779-788.
- S27 S. K. Singh and Q. Xu, *J. Am. Chem. Soc.*, 2009, **131**, 18032-18033.
- S28 L. He, Y. Q. Huang, A. Wang, X. Wang, X. Chen, J. J. Delgado and T. Zhang, *Angew. Chem. Int. Ed.*, 2012, **51**, 6191-6194.
- S29 S. K. Singh and Q. Xu, *Chem. Commun.*, 2010, **46**, 6545-6547.
